# Supplementary material for: The Role of the NRF2 Pathway in the Pathogenesis of Viral Respiratory Infections
Source: MDPI journal article supplement (doi:10.3390/pathogens13010039), 2023-12-31
Supplement: s1 [file s1]

**Supplementary Table S1: Impact of non-respiratory viruses on the Nrf2 pathway**

| Viruses                                                                                                           | Mechanism of Nrf2 activation                                                                                                                                                                                                                                                                                                     | Reference |
|-------------------------------------------------------------------------------------------------------------------|----------------------------------------------------------------------------------------------------------------------------------------------------------------------------------------------------------------------------------------------------------------------------------------------------------------------------------|-----------|
| HIV gp120 and Tat proteins, NS3 viral protein of HCV, other HCV viral proteins, Marburg virus (MARV) VP24 protein | <b>Viral proteins:</b> <ul style="list-style-type: none"> <li>• ↑ direct activation of Nrf2</li> <li>• HCV NS3 binds to cytosolic sMafs that regulate Nrf2.</li> <li>• HCV viral proteins ↑ ROS through a Ca<sup>2+</sup> signaling in the ER and ↑ Nrf2/ARE signaling.</li> <li>• MARV VP24 binds and ↓ Keap1 ↑ Nrf2</li> </ul> | [1-7]     |
| HPV                                                                                                               | Hypermethylation of the KEAP1 gene promoter CpG island ↓ Keap1 ↑ Nrf2                                                                                                                                                                                                                                                            | [8]       |
| Herpes viruses such as KSHV and EBV                                                                               | <ul style="list-style-type: none"> <li>• Herpes viruses ↓ Bach1, a major Keap1-independent regulator of Nrf2 ↑ Nrf2</li> </ul>                                                                                                                                                                                                   | [9,10]    |
| DNA viruses that can induce latency such as KSHV, HBV and RNA viruses such as SFTS                                | <ul style="list-style-type: none"> <li>• Alter autophagy, ↑ P62 ↓ KEAP1 binding to Nrf2 ↑ Nrf2</li> </ul>                                                                                                                                                                                                                        | [11-16]   |
| HCV                                                                                                               | <ul style="list-style-type: none"> <li>• ↑ phosphorylation of the redox-sensitive PKC ↑ NRF2 dissociation from KEAP1</li> </ul>                                                                                                                                                                                                  | [17]      |
| Hepatitis viruses                                                                                                 | <ul style="list-style-type: none"> <li>• ↑ PI3K-protein kinase B (Akt) signaling pathway which ↑ phosphorylation of GSK3 and cytosolic NRF2 to further ↑ its proteasomal degradation through a CULLIN1 (CUL1)-dependent mechanism</li> </ul>                                                                                     | [18,19]   |
| Dengue virus                                                                                                      | <ul style="list-style-type: none"> <li>• ↑ Nrf2 through the ER stress-protein kinase RNA-like ER kinase (PERK) signaling pathway</li> </ul>                                                                                                                                                                                      | [20]      |
| Human cytomegalovirus (HCMV)                                                                                      | <ul style="list-style-type: none"> <li>• ↑ ROS-independent casein kinase 2 (CK2) pathway ↑ Nrf2</li> </ul>                                                                                                                                                                                                                       | [21]      |
| Coxsackievirus B3 (CVB3)                                                                                          | <ul style="list-style-type: none"> <li>• ↑ 12/15-lipoxygenase (12/15-LO) (a lipid-peroxidizing enzyme involved in production of inflammatory mediators) ↓ Nrf2 in cardiac myocytes</li> </ul>                                                                                                                                    | [22]      |
| DNA viruses that can induce latency such as KSHV                                                                  | <ul style="list-style-type: none"> <li>• The viral genome can directly associate with Nrf2 in a manner that is dependent on the latency-associated KSHV protein LANA-1, which allows for the transcription of the latent viral proteins</li> </ul>                                                                               | [23]      |

Abbreviations: ROS: Reactive oxygen species; mito-ROS: mitochondrial Reactive oxygen species, ER: endoplasmic reticulum, sMafs: small Maf proteins, Nrf2: Nuclear factor erythroid 2-related factor, HCV, Hepatitis C virus, KEAP1: Kelch-like-ECH-associated protein 1, RSV: Respiratory syncytial virus, KSHV: Kaposi sarcoma-associated herpesvirus, EBV: Epstein Barr Virus, HBV: Hepatitis B virus, SFTS: Severe fever with thrombocytopenia syndrome, PKC: protein kinase C, PI3K: phosphatidylinositol 3-kinase (PI3K), GSK3: glycogen synthase kinase 3, COX-2: cyclooxygenase 2. PGE2: Prostaglandin E2.

## References in Supplemental Material

1. Staitieh, B.S.; Ding, L.; Neveu, W.A.; Spearman, P.; Guidot, D.M.; Fan, X. HIV-1 decreases Nrf2/ARE activity and phagocytic function in alveolar macrophages. *J Leukoc Biol* **2017**, *102*, 517-525, doi:10.1189/jlb.4A0616-282RR.
2. Mastrantonio, R.; Cervelli, M.; Pietropaoli, S.; Mariottini, P.; Colasanti, M.; Persichini, T. HIV-Tat Induces the Nrf2/ARE Pathway through NMDA Receptor-Elicited Spermine Oxidase Activation in Human Neuroblastoma Cells. *PLoS One* **2016**, *11*, e0149802, doi:10.1371/journal.pone.0149802.
3. Carvajal-Yepes, M.; Himmelsbach, K.; Schaedler, S.; Ploen, D.; Krause, J.; Ludwig, L.; Weiss, T.; Klingel, K.; Hildt, E. Hepatitis C virus impairs the induction of cytoprotective Nrf2 target genes by delocalization of small Maf proteins. *J Biol Chem* **2011**, *286*, 8941-8951, doi:10.1074/jbc.M110.186684.
4. Vomund, S.; Schafer, A.; Parnham, M.J.; Brune, B.; von Knethen, A. Nrf2, the Master Regulator of Anti-Oxidative Responses. *Int J Mol Sci* **2017**, *18*, doi:10.3390/ijms18122772.
5. Ivanov, A.V.; Smirnova, O.A.; Ivanova, O.N.; Masalova, O.V.; Kochetkov, S.N.; Isaguliants, M.G. Hepatitis C virus proteins activate NRF2/ARE pathway by distinct ROS-dependent and independent mechanisms in HUH7 cells. *PLoS One* **2011**, *6*, e24957, doi:10.1371/journal.pone.0024957.
6. Edwards, M.R.; Johnson, B.; Mire, C.E.; Xu, W.; Shabman, R.S.; Speller, L.N.; Leung, D.W.; Geisbert, T.W.; Amarasinghe, G.K.; Basler, C.F. The Marburg virus VP24 protein interacts with Keap1 to activate the cytoprotective antioxidant response pathway. *Cell Rep* **2014**, *6*, 1017-1025, doi:10.1016/j.celrep.2014.01.043.
7. Page, A.; Volchkova, V.A.; Reid, S.P.; Mateo, M.; Bagnaud-Baule, A.; Nemirov, K.; Shurtleff, A.C.; Lawrence, P.; Reynard, O.; Ottmann, M.; et al. Marburgvirus hijacks nrf2-dependent pathway by targeting nrf2-negative regulator keap1. *Cell Rep* **2014**, *6*, 1026-1036, doi:10.1016/j.celrep.2014.02.027.
8. Ma, J.Q.; Tuersun, H.; Jiao, S.J.; Zheng, J.H.; Xiao, J.B.; Hasim, A. Functional Role of NRF2 in Cervical Carcinogenesis. *PLoS One* **2015**, *10*, e0133876, doi:10.1371/journal.pone.0133876.

9. Komaravelli, N.; Ansar, M.; Garofalo, R.P.; Casola, A. Respiratory syncytial virus induces NRF2 degradation through a promyelocytic leukemia protein - ring finger protein 4 dependent pathway. *Free Radic Biol Med* **2017**, *113*, 494-504, doi:10.1016/j.freeradbiomed.2017.10.380.
10. Yin, Q.; McBride, J.; Fewell, C.; Lacey, M.; Wang, X.; Lin, Z.; Cameron, J.; Flemington, E.K. MicroRNA-155 is an Epstein-Barr virus-induced gene that modulates Epstein-Barr virus-regulated gene expression pathways. *J Virol* **2008**, *82*, 5295-5306, doi:10.1128/JVI.02380-07.
11. Jiang, T.; Harder, B.; Rojo de la Vega, M.; Wong, P.K.; Chapman, E.; Zhang, D.D. p62 links autophagy and Nrf2 signaling. *Free Radic Biol Med* **2015**, *88*, 199-204, doi:10.1016/j.freeradbiomed.2015.06.014.
12. Komatsu, M.; Kurokawa, H.; Waguri, S.; Taguchi, K.; Kobayashi, A.; Ichimura, Y.; Sou, Y.S.; Ueno, I.; Sakamoto, A.; Tong, K.I.; et al. The selective autophagy substrate p62 activates the stress responsive transcription factor Nrf2 through inactivation of Keap1. *Nat Cell Biol* **2010**, *12*, 213-223, doi:10.1038/ncb2021.
13. Gjyshi, O.; Flaherty, S.; Veettil, M.V.; Johnson, K.E.; Chandran, B.; Bottero, V. Kaposi's sarcoma-associated herpesvirus induces Nrf2 activation in latently infected endothelial cells through SQSTM1 phosphorylation and interaction with polyubiquitinated Keap1. *J Virol* **2015**, *89*, 2268-2286, doi:10.1128/JVI.02742-14.
14. Gjyshi, O.; Roy, A.; Dutta, S.; Veettil, M.V.; Dutta, D.; Chandran, B. Activated Nrf2 Interacts with Kaposi's Sarcoma-Associated Herpesvirus Latency Protein LANA-1 and Host Protein KAP1 To Mediate Global Lytic Gene Repression. *J Virol* **2015**, *89*, 7874-7892, doi:10.1128/JVI.00895-15.
15. Liu, B.; Fang, M.; He, Z.; Cui, D.; Jia, S.; Lin, X.; Xu, X.; Zhou, T.; Liu, W. Hepatitis B virus stimulates G6PD expression through HBx-mediated Nrf2 activation. *Cell Death Dis* **2015**, *6*, e1980, doi:10.1038/cddis.2015.322.
16. Choi, Y.; Jiang, Z.; Shin, W.J.; Jung, J.U. Severe Fever with Thrombocytopenia Syndrome Virus NSs Interacts with TRIM21 To Activate the p62-Keap1-Nrf2 Pathway. *J Virol* **2020**, *94*, doi:10.1128/JVI.01684-19.
17. Smirnova, O.A.; Ivanova, O.N.; Mukhtarov, F.S.; Tunitskaya, V.L.; Jansons, J.; Isagulians, M.G.; Kochetkov, S.N.; Ivanov, A.V. Analysis of the Domains of Hepatitis C Virus Core and NS5A Proteins that Activate the Nrf2/ARE Cascade. *Acta Naturae* **2016**, *8*, 123-127.

18. Guo, H.; Zhou, T.; Jiang, D.; Cuconati, A.; Xiao, G.H.; Block, T.M.; Guo, J.T. Regulation of hepatitis B virus replication by the phosphatidylinositol 3-kinase-akt signal transduction pathway. *J Virol* **2007**, *81*, 10072-10080, doi:10.1128/JVI.00541-07.
19. Rada, P.; Rojo, A.I.; Chowdhry, S.; McMahon, M.; Hayes, J.D.; Cuadrado, A. SCF/beta-TrCP promotes glycogen synthase kinase 3-dependent degradation of the Nrf2 transcription factor in a Keap1-independent manner. *Mol Cell Biol* **2011**, *31*, 1121-1133, doi:10.1128/MCB.01204-10.
20. Cheng, Y.L.; Lin, Y.S.; Chen, C.L.; Tsai, T.T.; Tsai, C.C.; Wu, Y.W.; Ou, Y.D.; Chu, Y.Y.; Wang, J.M.; Yu, C.Y.; et al. Activation of Nrf2 by the dengue virus causes an increase in CLEC5A, which enhances TNF-alpha production by mononuclear phagocytes. *Sci Rep* **2016**, *6*, 32000, doi:10.1038/srep32000.
21. Lee, J.; Koh, K.; Kim, Y.E.; Ahn, J.H.; Kim, S. Upregulation of Nrf2 expression by human cytomegalovirus infection protects host cells from oxidative stress. *J Gen Virol* **2013**, *94*, 1658-1668, doi:10.1099/vir.0.052142-0.
22. Ai, F.; Zheng, J.; Zhang, Y.; Fan, T. Inhibition of 12/15-LO ameliorates CVB3-induced myocarditis by activating Nrf2. *Chem Biol Interact* **2017**, *272*, 65-71, doi:10.1016/j.cbi.2017.05.010.
23. Gjyshi, O.; Bottero, V.; Veettil, M.V.; Dutta, S.; Singh, V.V.; Chikoti, L.; Chandran, B. Kaposi's sarcoma-associated herpesvirus induces Nrf2 during de novo infection of endothelial cells to create a microenvironment conducive to infection. *PLoS Pathog* **2014**, *10*, e1004460, doi:10.1371/journal.ppat.1004460.
